# Supplementary material for: The analysis of risk factors for recurrent wheezing in infants and clinical intervention
Source: PubMed Central journal article supplement — Transl Pediatr. 2023 Oct 24;12(10):1810–22. doi: 10.21037/tp-23-45 (PMC10644017; doi:10.21037/tp-23-45), 2023-10-24
Supplement: tp-12-10-1810-dss.pdf [file tp-12-10-1810-dss.pdf]

## Data Sharing Statement

|                     |                                                                                                                                                    |                                                                                                                                                                                                 |
|---------------------|----------------------------------------------------------------------------------------------------------------------------------------------------|-------------------------------------------------------------------------------------------------------------------------------------------------------------------------------------------------|
| <b>Article Info</b> | <a href="https://dx.doi.org/10.21037/tp-23-45">https://dx.doi.org/10.21037/tp-23-45</a>                                                            |                                                                                                                                                                                                 |
| <b>Item</b>         | <b>Question</b>                                                                                                                                    | <b>Authors' Response<br/>(place "-" if not applicable)</b>                                                                                                                                      |
| 1                   | Would you like to share data collected for your study to others?                                                                                   | No.                                                                                                                                                                                             |
| 2                   | If not, would you like to share the reason for your decision?                                                                                      | Due to policy of school of clinical medicine, raw data information cannot be shared for public. Researchers privately can ask for these data only for valid scientific use and with permission. |
| 3                   | What data in particular will be shared?                                                                                                            | -                                                                                                                                                                                               |
| 4                   | Any other documents will be share? Such as study protocol, statistical analysis plan, informed consent form, clinical study report, analytic code. | -                                                                                                                                                                                               |
| 5                   | When will data availability begin?                                                                                                                 | -                                                                                                                                                                                               |
| 6                   | When will data availability end?                                                                                                                   | -                                                                                                                                                                                               |
| 7                   | To whom will you share the data?                                                                                                                   | -                                                                                                                                                                                               |
| 8                   | For what type of analysis or purpose?                                                                                                              | -                                                                                                                                                                                               |
| 9                   | How or where can the data/documents be obtained?                                                                                                   | -                                                                                                                                                                                               |
| 10                  | Any other restrictions?                                                                                                                            | -                                                                                                                                                                                               |
